# Supplementary material for: Quantification of Protein Uptake by Endocytosis in Carnivorous Nepenthales
Source: MDPI journal article supplement (doi:10.3390/plants12020341), 2023-01-11
Supplement: s1 [file s1]

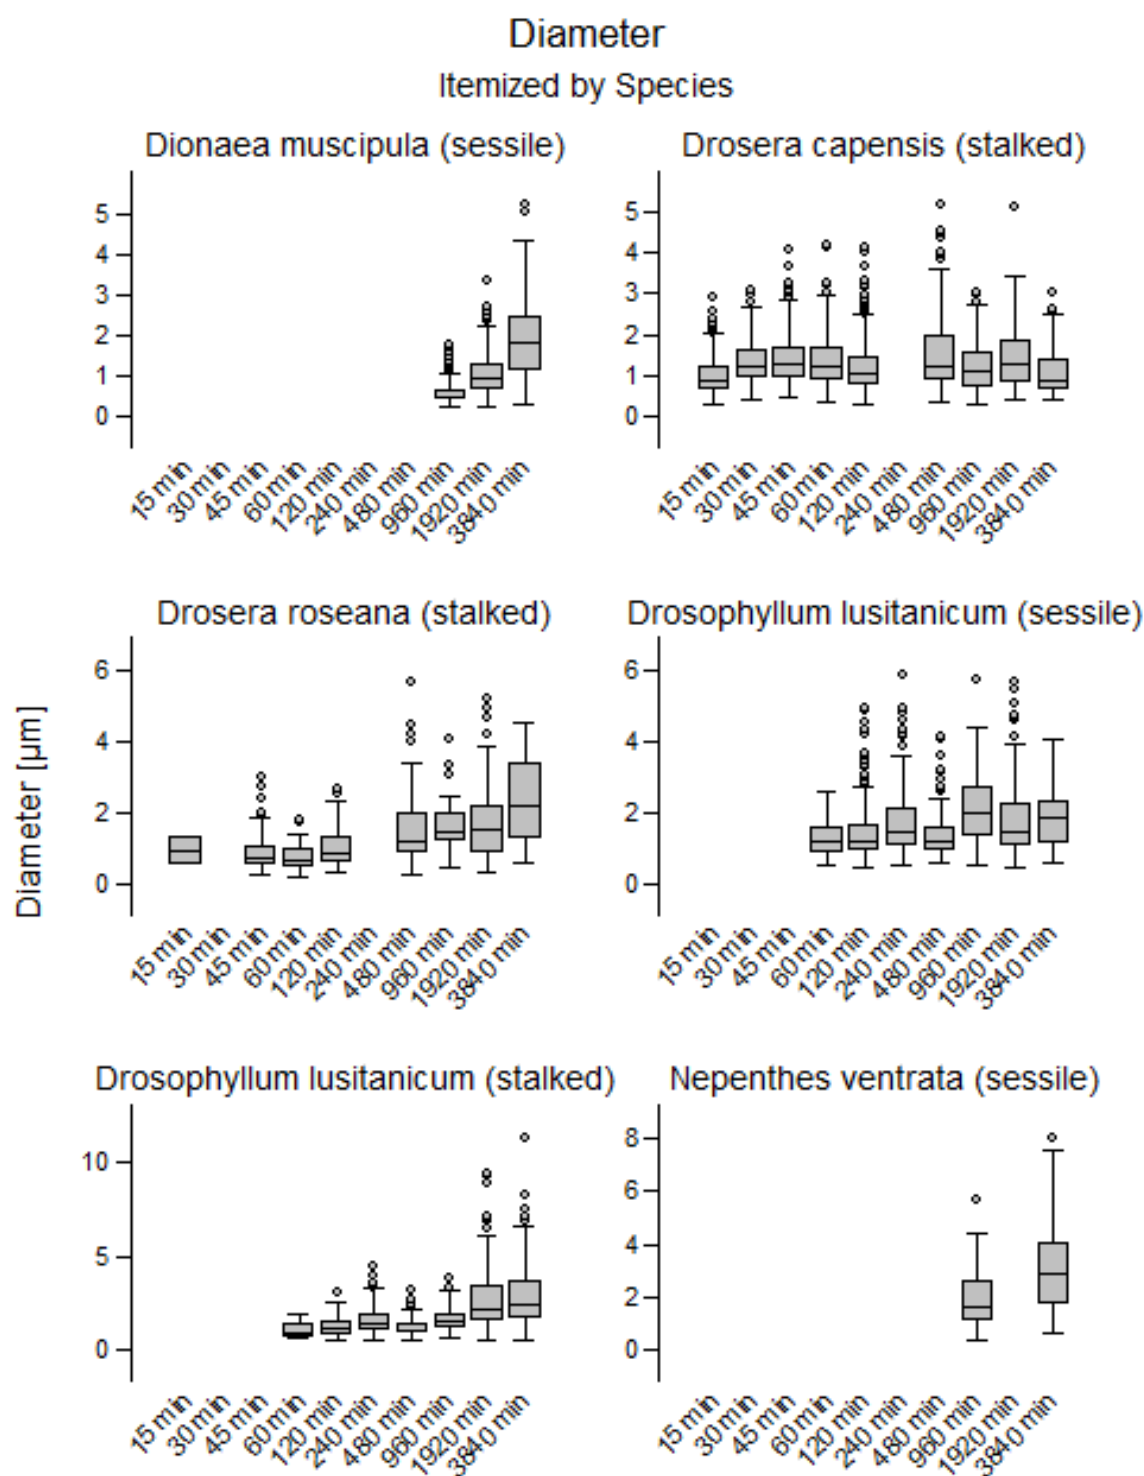

Figure S1. Boxplots of vesicle diameters in observed glandular cells in *Dionea muscipula*, *Drosera roseana*, *Drosera capensis*, *Nepenthes × ventrata* and stalked and sessile glands in *Drosophyllum lusitanicum*.

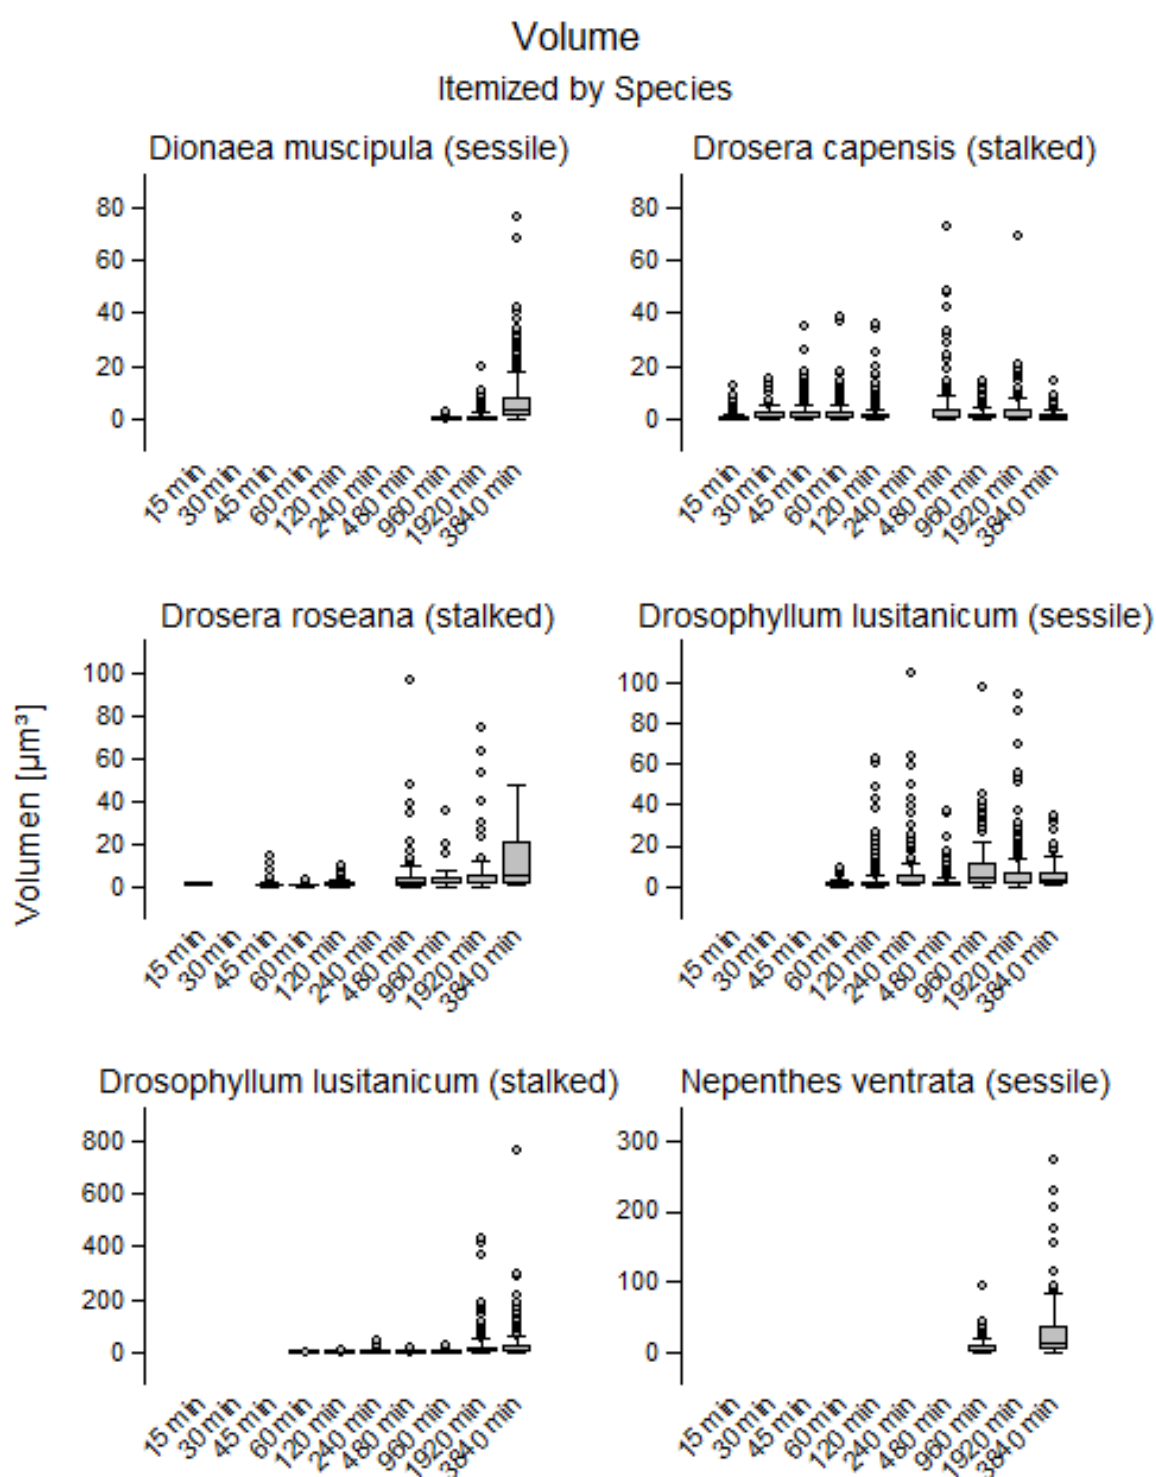

Figure S2. Boxplot of vesicle volumes in observed glandular cells in *Dionaea muscipula*, *Drosera roseana*, *Drosera capensis*, *Nepenthes × ventrata* and stalked and sessile glands in *Drosophyllum lusitanicum*.

32  
33  
34

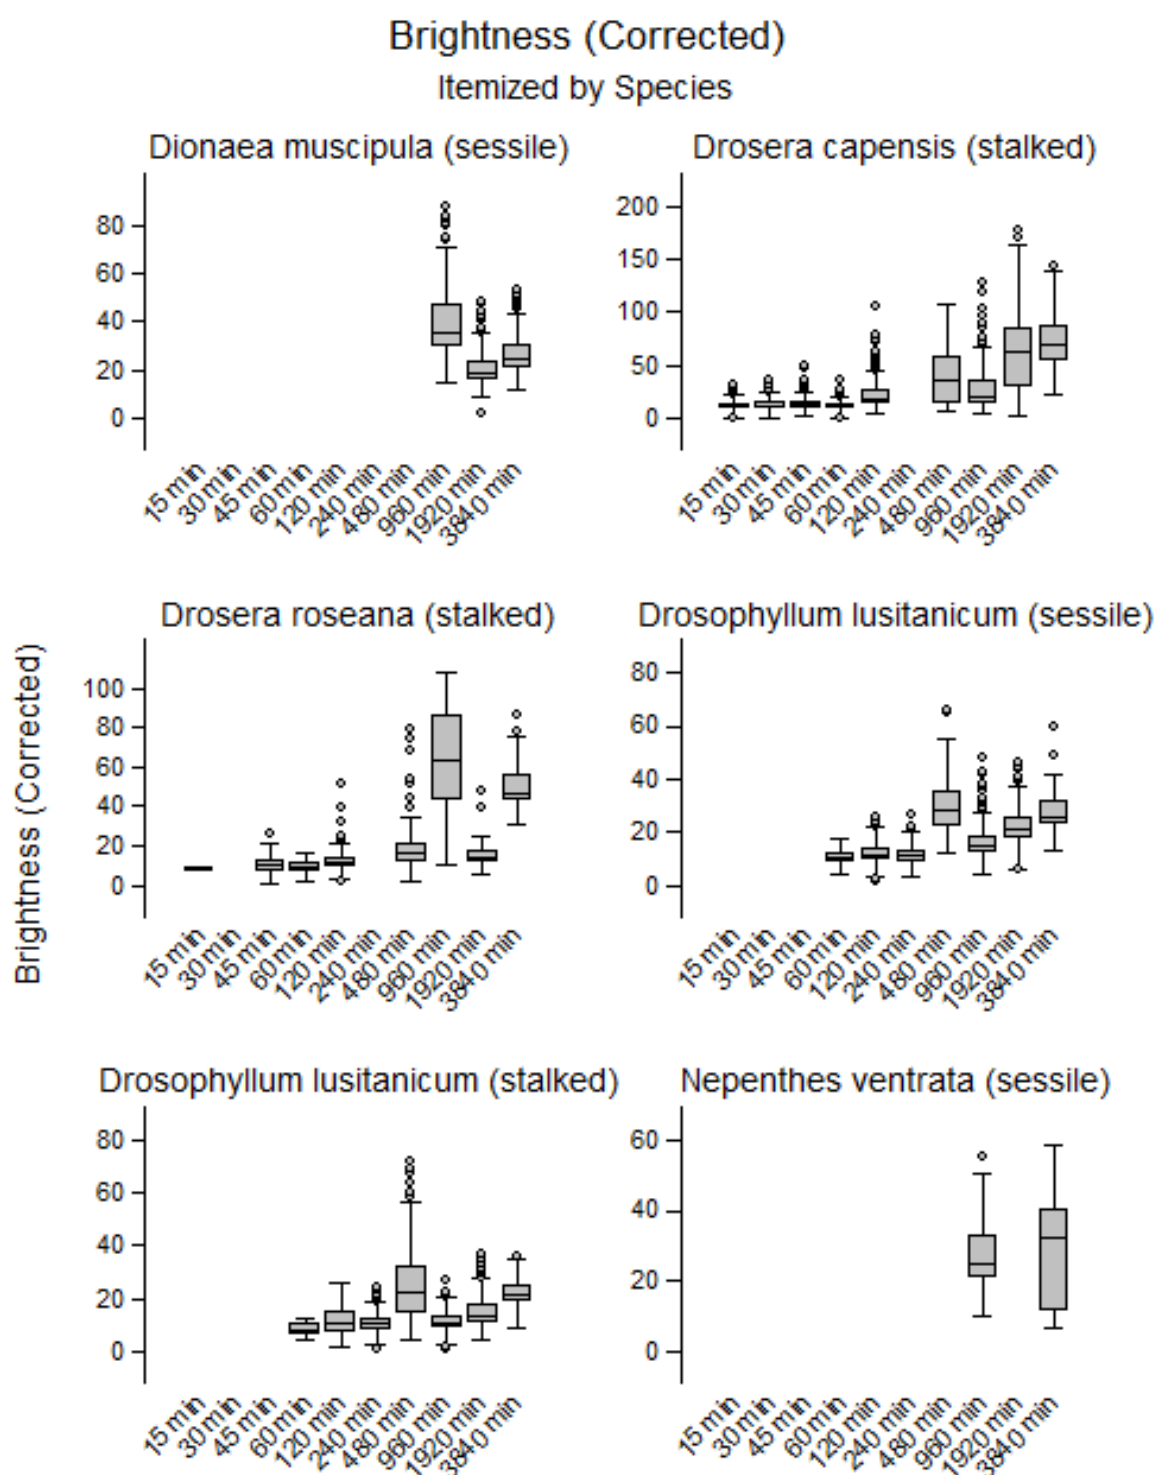

Figure S3. Boxplot of corrected brightness of vesicles in observed glandular cells in *Dionaea muscipula*, *Drosera roseana*, *Drosera capensis*, *Nepenthes × ventrata* and stalked and sessile glands in *Drosophyllum lusitanicum*.

37

38

39

40

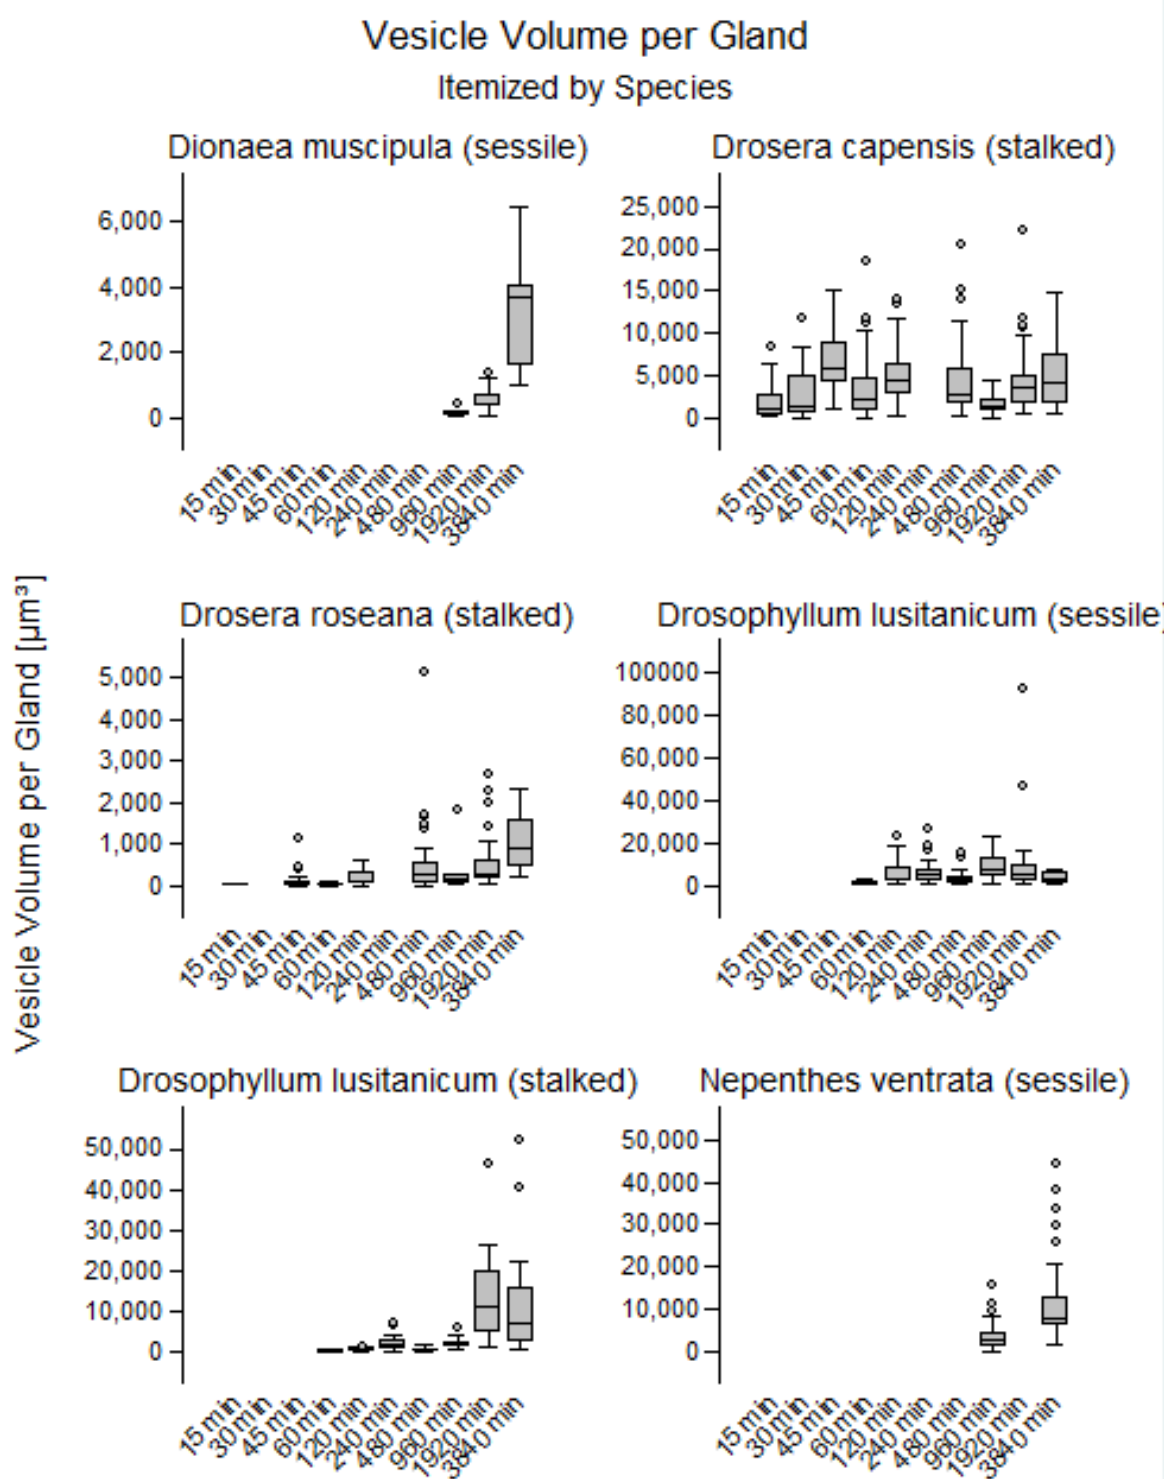

Figure S4. Boxplots of vesicle volumes in observed glands in *Dionea muscipula*, *Drosera roseana*, *Drosera capensis*, *Nepenthes × ventrata* and stalked and sessile glands in *Drosophyllum lusitanicum*.

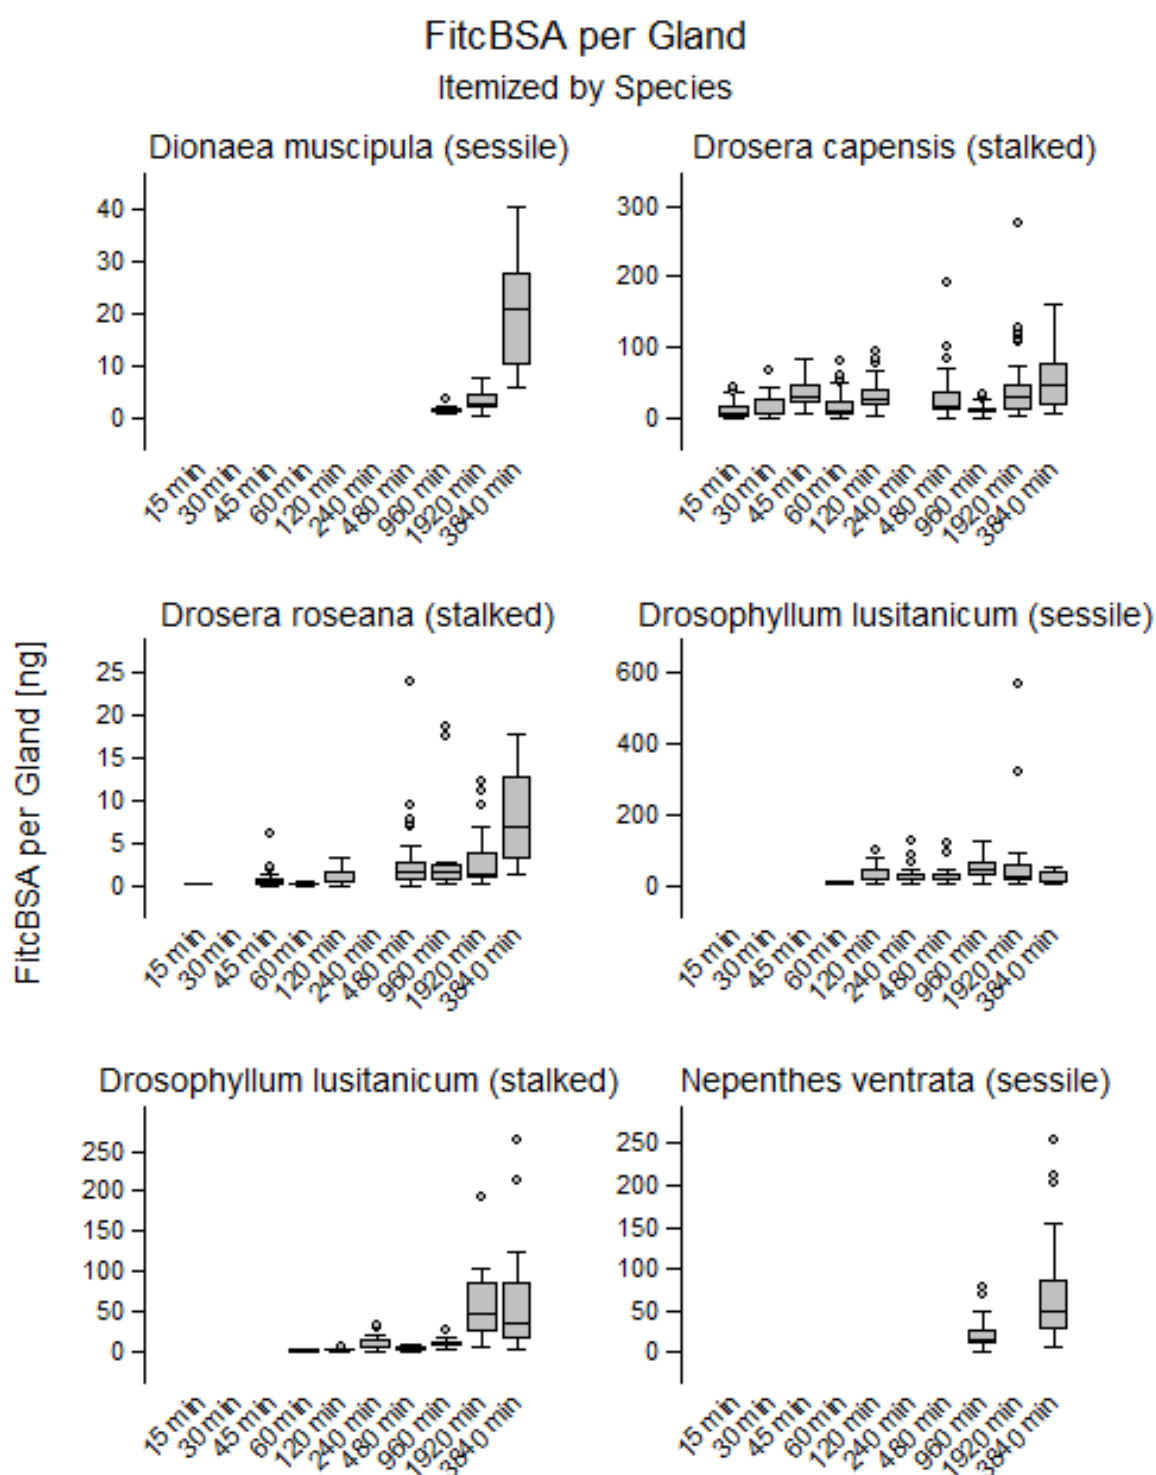

Figure S5. Boxplot of FITC-BSA content in observed glands in *Dionaea muscipula*, *Drosera roseana*, *Drosera capensis*, *Nepenthes × ventrata* and stalked and sessile glands in *Drosophyllum lusitanicum*.

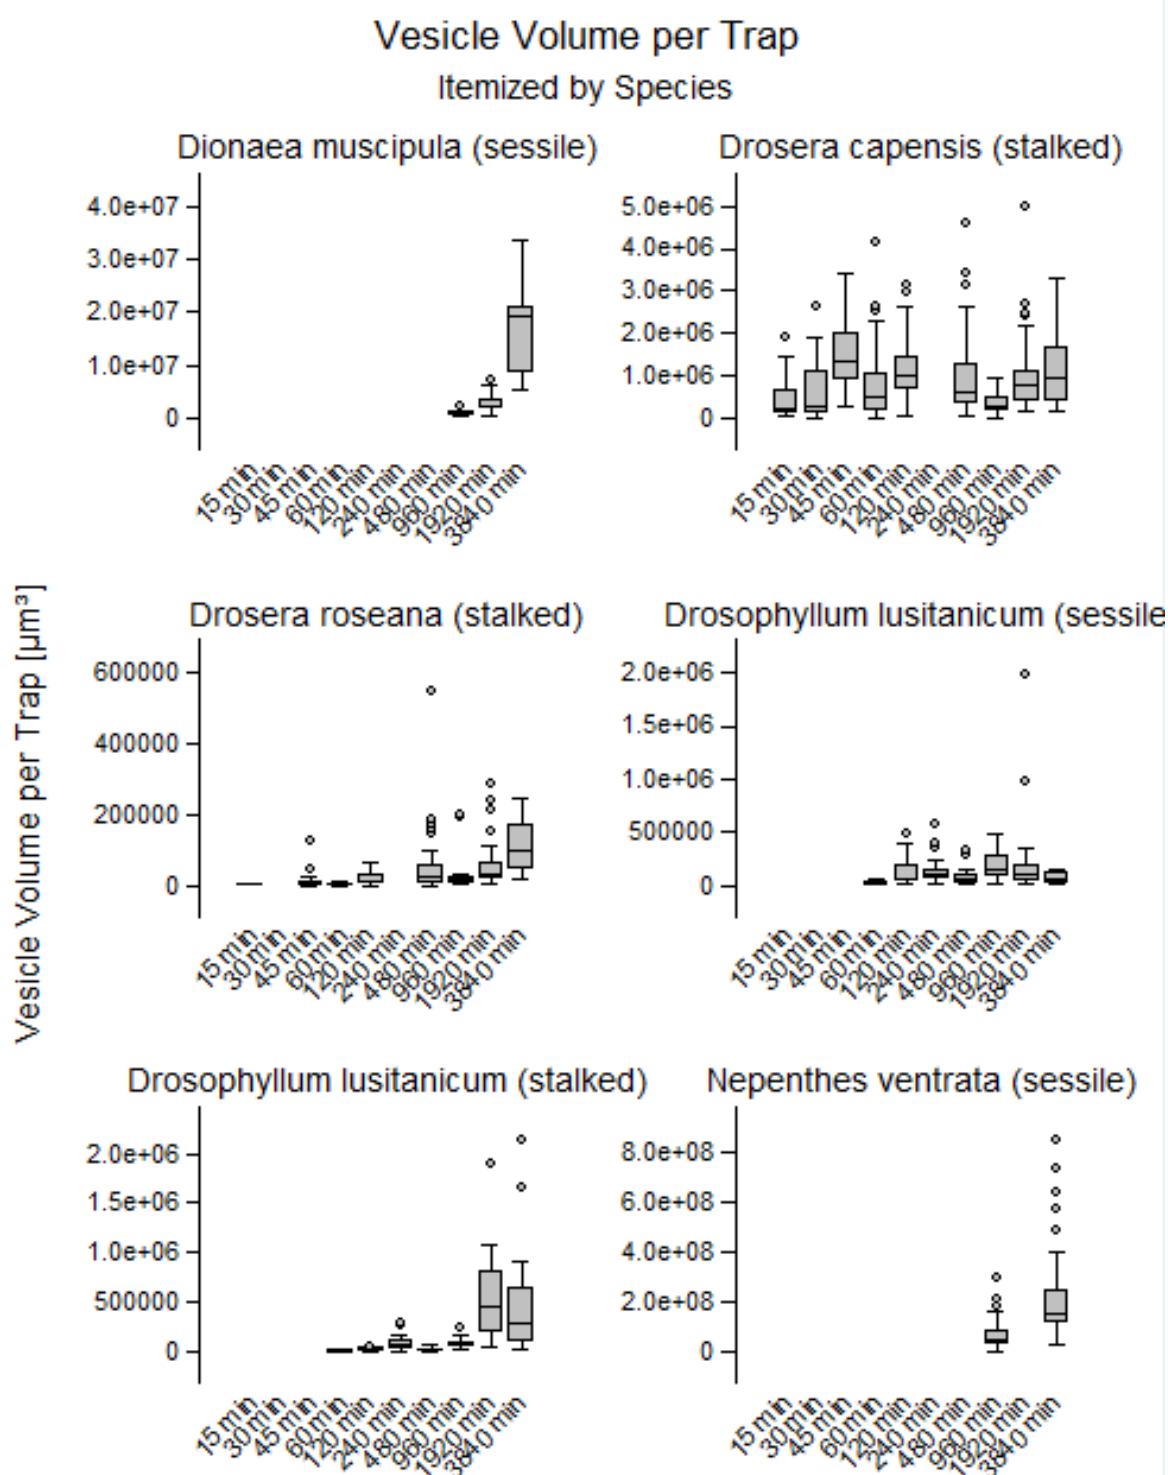

Figure S6. Boxplot of vesicle volume per trap (DZ) in *Dionaea muscipula*, *Drosera roseana*, *Drosera capensis*, *Nepenthes × ventrata* and stalked and sessile glands in *Drosophyllum lusitanicum*.

Table S1. Regression analysis itemized by species.

56

| Species                                      | R <sup>2</sup> | p-value<br>(Model) | Slope<br>(95% CI)          | p-value<br>(Time) | Constant<br>(95% CI)  | p-value<br>(Constant) |
|----------------------------------------------|----------------|--------------------|----------------------------|-------------------|-----------------------|-----------------------|
| <b>Vesicle Number</b>                        |                |                    |                            |                   |                       |                       |
| <i>Dionaea muscipula</i>                     | 0,37           | < 0.001            | -.35<br>(-.48 - -.21)      | < 0.001           | 41.2<br>(35.1 - 47.3) | < 0.001               |
| <i>Drosera capensis</i>                      | 0              | 0,691              | -.011<br>(-.067 - .045)    | 0,691             | 10.4<br>(9.56 - 11.3) | < 0.001               |
| <i>Drosera roseana</i>                       | 0,07           | < 0.001            | -.041<br>(-.063 - -.018)   | < 0.001           | 3.94<br>(3.44 - 4.44) | < 0.001               |
| <i>Drosophyllum lusitanicum</i><br>(sessile) | 0,07           | 0,001              | -.074<br>(-.12 - -.032)    | 0,001             | 9.22<br>(8.11 - 10.3) | < 0.001               |
| <i>Drosophyllum lusitanicum</i><br>(stalked) | 0,04           | 0,019              | -.057<br>(-.11 - -.0097)   | 0,019             | 12.5<br>(10.9 - 14.2) | < 0.001               |
| <i>Nepenthes x ventrata</i>                  | 0,05           | 0,041              | -.016<br>(-.032 - -.00071) | 0,041             | 3.45<br>(2.68 - 4.22) | < 0.001               |
| <b>Diameter</b>                              |                |                    |                            |                   |                       |                       |
| <i>Dionaea muscipula</i>                     | 0,43           | < 0.001            | .027<br>(.026 - .029)      | < 0.001           | .13<br>(.061 - .2)    | < 0.001               |
| <i>Drosera capensis</i>                      | 0              | 0,777              | -.00018<br>(-.0014 - .001) | 0,777             | 1.24<br>(1.21 - 1.26) | < 0.001               |
| <i>Drosera roseana</i>                       | 0,17           | < 0.001            | .023<br>(.019 - .027)      | < 0.001           | .990<br>(.91 - 1.07)  | < 0.001               |
| <i>Drosophyllum lusitanicum</i><br>(sessile) | 0,03           | < 0.001            | .0095<br>(.0065 - .012)    | < 0.001           | 1.46<br>(1.4 - 1.52)  | < 0.001               |
| <i>Drosophyllum lusitanicum</i><br>(stalked) | 0,21           | < 0.001            | .027<br>(.024 - .03)       | < 0.001           | 1.3<br>(1.22 - 1.39)  | < 0.001               |
| <i>Nepenthes x ventrata</i>                  | 0,17           | < 0.001            | .025<br>(.018 - .032)      | < 0.001           | 1.46<br>(1.12 - 1.8)  | < 0.001               |
| <b>Brightness</b>                            |                |                    |                            |                   |                       |                       |
| <i>Dionaea muscipula</i>                     | 0,1            | < 0.001            | -.2<br>(-.24 - -.17)       | < 0.001           | 35.7<br>(34.3 - 37)   | < 0.001               |
| <i>Drosera capensis</i>                      | 0,48           | < 0.001            | 1<br>(.970 - 1.04)         | < 0.001           | 15.8<br>(15.2 - 16.4) | < 0.001               |
| <i>Drosera roseana</i>                       | 0,19           | < 0.001            | .49<br>(.40 - .57)         | < 0.001           | 13.3<br>(11.7 - 14.9) | < 0.001               |
| <i>Drosophyllum lusitanicum</i><br>(sessile) | 0,1            | < 0.001            | .21<br>(.18 - .24)         | < 0.001           | 16.1<br>(15.5 - 16.8) | < 0.001               |
| <i>Drosophyllum lusitanicum</i><br>(stalked) | 0,09           | < 0.001            | .12<br>(.099 - .14)        | < 0.001           | 13.2<br>(12.6 - 13.9) | < 0.001               |
| <i>Nepenthes x ventrata</i>                  | 0,01           | 0,111              | .053<br>(-.012 - .12)      | 0,111             | 25.9<br>(22.9 - 29)   | < 0.001               |
| <b>Concentration</b>                         |                |                    |                            |                   |                       |                       |
| <i>Dionaea muscipula</i>                     | 0,31           | < 0.001            | -.035<br>(-.038 - -.032)   | < 0.001           | 8.29<br>(8.17 - 8.40) | < 0.001               |
| <i>Drosera capensis</i>                      | 0,48           | < 0.001            | .08<br>(.077 - .083)       | < 0.001           | 5.52<br>(5.47 - 5.56) | < 0.001               |
| <i>Drosera roseana</i>                       | 0,14           | < 0.001            | .034<br>(.027 - .041)      | < 0.001           | 5.37<br>(5.24 - 5.5)  | < 0.001               |
| <i>Drosophyllum lusitanicum</i><br>(sessile) | 0,09           | < 0.001            | .021<br>(.018 - .025)      | < 0.001           | 5.41<br>(5.34 - 5.48) | < 0.001               |

|                                              |      |         |                                |         |                                    |         |
|----------------------------------------------|------|---------|--------------------------------|---------|------------------------------------|---------|
| <i>Drosophyllum lusitanicum</i><br>(stalked) | 0,02 | < 0.001 | .0067<br>(.0043 - .009)        | < 0.001 | 5.09<br>(5.02 - 5.16)              | < 0.001 |
| <i>Nepenthes x ventrata</i>                  | 0,01 | 0,066   | -.0062<br>(-.013 - .00041)     | 0,066   | 6.56<br>(6.24 - 6.87)              | < 0.001 |
| <b>Vesicle Volume per Gland</b>              |      |         |                                |         |                                    |         |
| <i>Dionaea muscipula</i>                     | 0,66 | < 0.001 | 2.82<br>(2.23 - 3.41)          | < 0.001 | -54.6<br>(-81.7 - -27.5)           | < 0.001 |
| <i>Drosera capensis</i>                      | 0    | 0,522   | .044<br>(-.091 - .18)          | 0,522   | 18.9<br>(16.7 - 21)                | < 0.001 |
| <i>Drosera roseana</i>                       | 0,11 | < 0.001 | .34<br>(.19 - .49)             | < 0.001 | 5.41<br>(2.08 - 8.74)              | 0,002   |
| <i>Drosophyllum lusitanicum</i><br>(sessile) | 0    | 0,931   | .017<br>(-.38 - .41)           | 0,931   | 35.2<br>(24.9 - 45.6)              | < 0.001 |
| <i>Drosophyllum lusitanicum</i><br>(stalked) | 0,22 | < 0.001 | 3.71<br>(2.46 - 4.95)          | < 0.001 | 26.3<br>(-16.6 - 69.2)             | 0,227   |
| <i>Nepenthes x ventrata</i>                  | 0,21 | < 0.001 | .990<br>(.57 - 1.41)           | < 0.001 | 6.1<br>(-14.8 - 27)                | 0,564   |
| <b>FITC-BSA Content per Gland</b>            |      |         |                                |         |                                    |         |
| <i>Dionaea muscipula</i>                     | 0,63 | < 0.001 | .018<br>(.014 - .021)          | < 0.001 | -.34<br>(-.52 - -.16)              | < 0.001 |
| <i>Drosera capensis</i>                      | 0,07 | < 0.001 | .0027<br>(.0017 - .0037)       | < 0.001 | .1<br>(.083 - .12)                 | < 0.001 |
| <i>Drosera roseana</i>                       | 0,17 | < 0.001 | .0025<br>(.0016 - .0034)       | < 0.001 | .025<br>(.0058 - .045)             | 0,011   |
| <i>Drosophyllum lusitanicum</i><br>(sessile) | 0    | 0,485   | .00083<br>(-.0015 - .0032)     | 0,485   | .18<br>(.12 - .24)                 | < 0.001 |
| <i>Drosophyllum lusitanicum</i><br>(stalked) | 0,25 | < 0.001 | .019<br>(.013 - .025)          | < 0.001 | .098<br>(-.1 - .3)                 | 0,332   |
| <i>Nepenthes x ventrata</i>                  | 0,2  | < 0.001 | .0054<br>(.0031 - .0078)       | < 0.001 | .045<br>(-.074 - .16)              | 0,454   |
| <b>Vesicle Volume per Trap</b>               |      |         |                                |         |                                    |         |
| <i>Dionaea muscipula</i>                     | 0,66 | < 0.001 | 357000<br>(282000 - 432000)    | < 0.001 | -6920000<br>(-10400000 - -3480000) | < 0.001 |
| <i>Drosera capensis</i>                      | 0    | 0,522   | 2070<br>(-4280 - 8410)         | 0,522   | 884000<br>(783000 - 986000)        | < 0.001 |
| <i>Drosera roseana</i>                       | 0,11 | < 0.001 | 1280<br>(718 - 1850)           | < 0.001 | 20700<br>(7940 - 33400)            | 0,002   |
| <i>Drosophyllum lusitanicum</i><br>(sessile) | 0    | 0,931   | 64.7<br>(-1400 - 1530)         | 0,931   | 131000<br>(92200 - 169000)         | < 0.001 |
| <i>Drosophyllum lusitanicum</i><br>(stalked) | 0,22 | < 0.001 | 7010<br>(4650 - 9370)          | < 0.001 | 49800<br>(-31400 - 131000)         | 0,227   |
| <i>Nepenthes x ventrata</i>                  | 0,21 | < 0.001 | 3110000<br>(1790000 - 4420000) | < 0.001 | 19100000<br>(-46400000 - 84600000) | 0,564   |
| <b>FITC-BSA Content per Trap</b>             |      |         |                                |         |                                    |         |
| <i>Dionaea muscipula</i>                     | 0,63 | < 0.001 | 2230<br>(1730 - 2720)          | < 0.001 | -42700<br>(-65300 - -20000)        | < 0.001 |
| <i>Drosera capensis</i>                      | 0,07 | < 0.001 | 127<br>(78.8 - 175)            | < 0.001 | 4670<br>(3900 - 5440)              | < 0.001 |
| <i>Drosera roseana</i>                       | 0,17 | < 0.001 | 9.61<br>(6.29 - 12.9)          | < 0.001 | 96.7<br>(22.2 - 171)               | 0,011   |
| <i>Drosophyllum lusitanicum</i>              | 0    | 0,485   | 3.1                            | 0,485   | 671                                | < 0.001 |



|                                 |      |         |                |         |                    |       |
|---------------------------------|------|---------|----------------|---------|--------------------|-------|
| (sessile)                       |      |         | (-5.64 - 11.8) |         | (441 - 901)        |       |
| <i>Drosophyllum lusitanicum</i> | 0,25 | < 0.001 | 36.1           | < 0.001 | 185                | 0,332 |
| (stalked)                       |      |         | (25.2 - 47)    |         | (-191 - 560)       |       |
| <i>Nepenthes x ventrata</i>     | 0,2  | < 0.001 | 17000          | < 0.001 | 140000             | 0,454 |
|                                 |      |         | (9600 - 24500) |         | (-231000 - 511000) |       |

57

58
